# Supplementary material for: Microfluidic Protein Imaging Platform: Study of Tau Protein Aggregation and Alzheimer’s Drug Response
Source: MDPI journal article supplement (doi:10.3390/bioengineering7040162), 2020-12-13
Supplement: s1 [file s1]

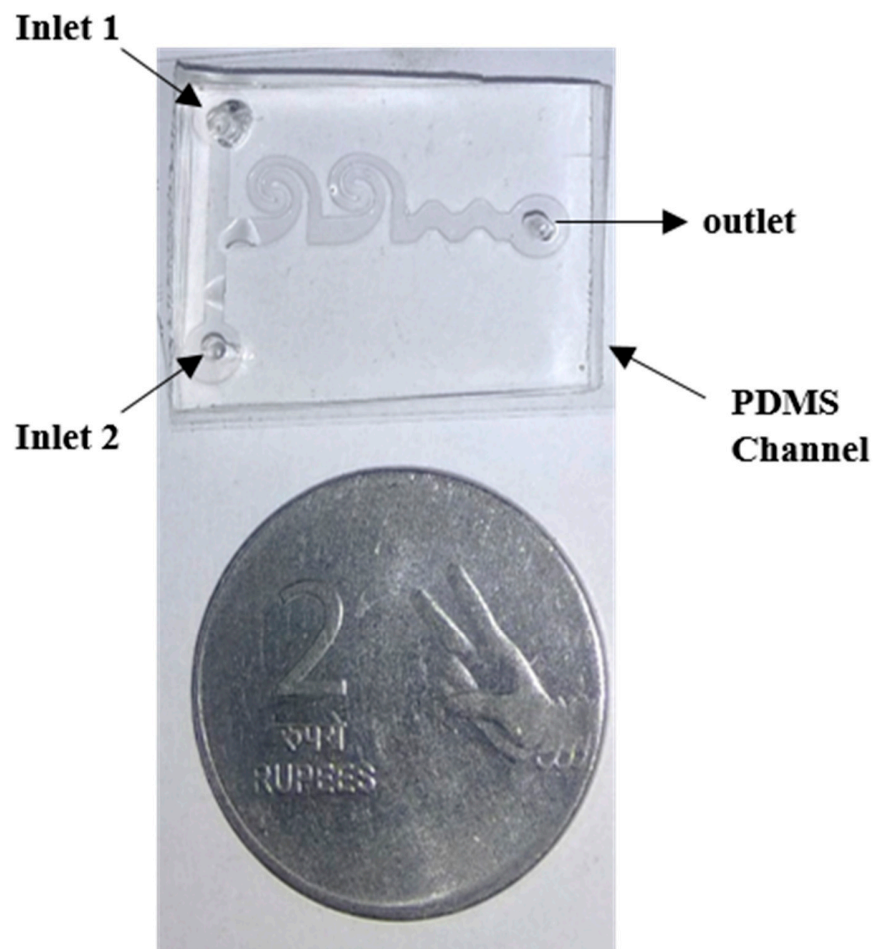

**Figure S1:** Microfluidic device compared with coin of radius 2.5 cm as a scale

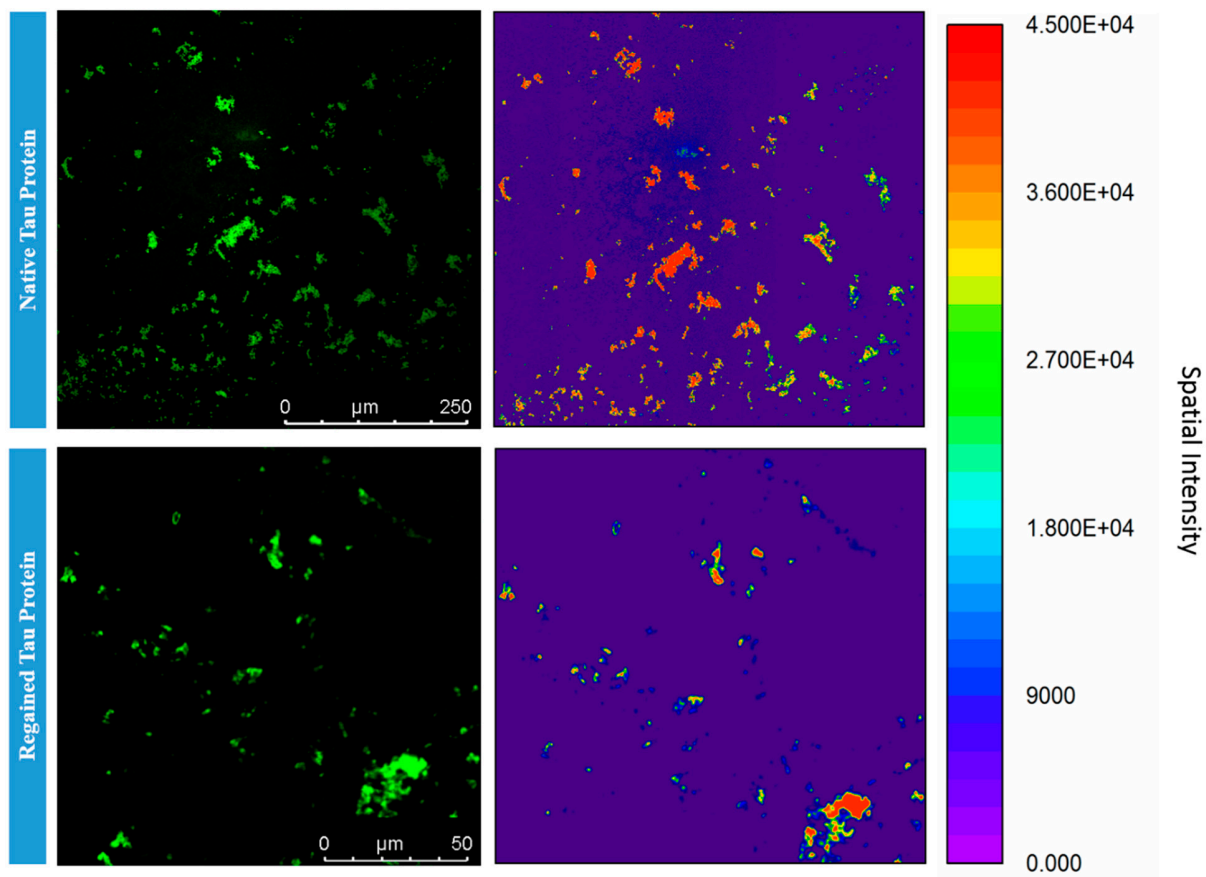

**Figure S2:** Spatial Intensity map for comparative study between the native tau protein and regained tau protein at drug dose 1.43  $\mu\text{g}/\mu\text{L}$  [Representative image from the imaging window].

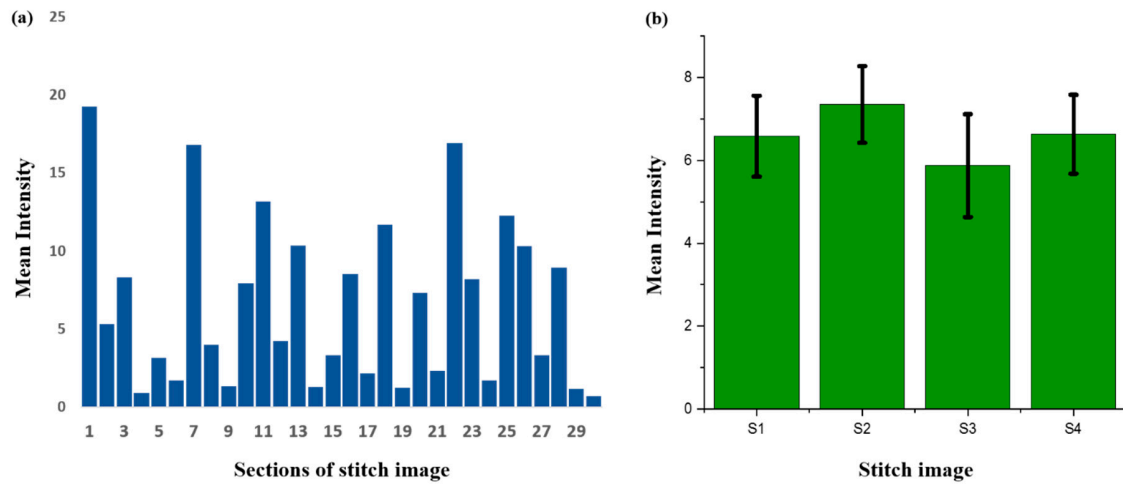

**Figure S3:** Heterogeneity in native tau protein intensity in different sections/tiles of imaging window (a) Tau protein intensity in each section/tile in a stitched image and (b) Average intensity in each stitched image, S1, S2, S3, S4 (Mean  $\pm$  S.E.) for native tau protein.
